# Supplementary material for: The Incidence of Myocarditis and Pericarditis in Post COVID-19 Unvaccinated Patients—A Large Population-Based Study
Source: MDPI journal article supplement (doi:10.3390/jcm11082219), 2022-04-15
Supplement: s1 [file s1]

## Supplementary Figures and Tables

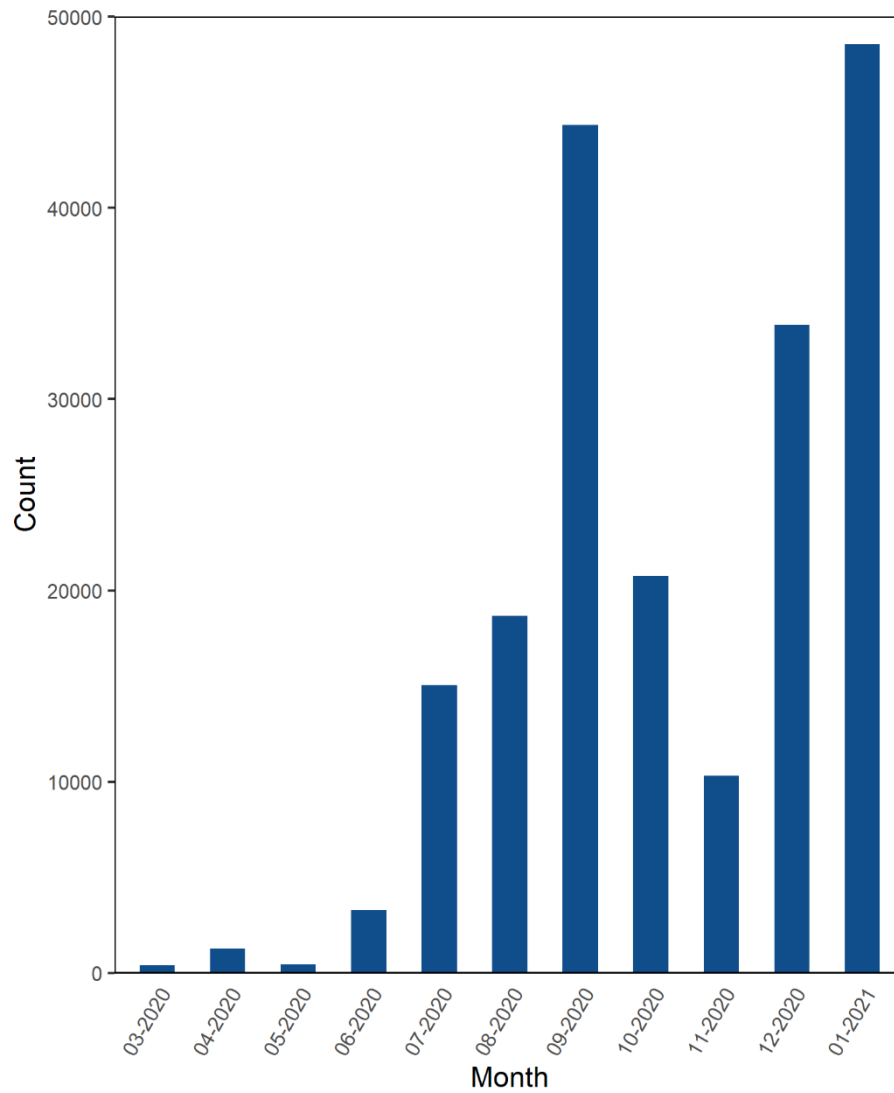

**Figure S1. Number of patients with positive PCR in the COVID-19 cohort by month during the study period.**

**Table S1. ICD-10 codes for cardiac risk factors.**

| Diagnosis              | ICD-10 code                                                                                                                                                                                                                            |
|------------------------|----------------------------------------------------------------------------------------------------------------------------------------------------------------------------------------------------------------------------------------|
| Obesity                | E66, E66.01, E66.2, E66.3, E66.9, E67                                                                                                                                                                                                  |
| Diabetes Mellitus      | E08.42, E08.65, E08.9, E10.10, E10.29, E10.311, E10.40, E10.65, E10.9, E11.00, E11.21, E11.29, E11.311, E11.40, E11.51, E11.618, E11.641, E11.65, E11.8, E11.9, E13, E13.1, E13.3, E13.31, E13.35, E13.36, E13.4, E13.69, E13.8, E13.9 |
| Hyperlipidemia         | E78, E78.0, E78.1, E78.2, E78.4, E78.9                                                                                                                                                                                                 |
| CKD                    | I12.0, N18, N18.2, N18.3, N18.4, N18.5, N18.6, N18.9, N19                                                                                                                                                                              |
| PVD                    | I73, I73.9                                                                                                                                                                                                                             |
| Essential hypertension | I10                                                                                                                                                                                                                                    |
| ACS                    | I20.0, I21, I21.0, I21.09, I21.1, I21.11, I21.19, I21.2, I21.29, I21.3, I21.4, I23.0, I24.0, I24.8, I25.1                                                                                                                              |
| CVA                    | G45, G45.0, G45.4, G45.9, I63.019, I63.139, I63.30, I63.40, I63.50, I67.89                                                                                                                                                             |
| Heart failure          | I09.81, I50, I50.1, I50.2, I50.21, I50.22, I50.23, I50.3, I50.30, I50.32, I50.33, I50.42, I50.43, I50.9                                                                                                                                |

CKD = chronic kidney disease. PVD = peripheral vascular disease. CVA = Cerebrovascular Accident, ACS = acute coronary syndrome. HF = Heart Failure.

**Table S2. Crude and adjusted HRs for myocarditis.**

|                | Univariable model       |                    | Multivariable model        |                |
|----------------|-------------------------|--------------------|----------------------------|----------------|
|                | HR (95% CI)             | P Value            | aHR (95% CI)               | P Value        |
| COVID-19       | 1.00 (0.47-2.13)        | 1.000              | 1.08 (0.45-2.56)           | 0.869          |
| Age            | 0.98 (0.96-1.00)        | 0.124              | <b>0.96 (0.93-1.00)</b>    | <b>0.045 *</b> |
| Sex (male)     | <b>4.09 (1.86-8.97)</b> | <b>&lt;0.001 *</b> | <b>4.42 (1.64-11.96) *</b> | <b>0.003 *</b> |
| BMI            | 1.01 (0.99-1.02)        | 0.595              | 1.00 (0.97-1.04)           | 0.935          |
| Diabetes       | 1.21 (0.47-3.12)        | 0.689              | 1.15 (0.26-5.00)           | 0.856          |
| Hyperlipidemia | 0.60 (0.27-1.32)        | 0.205              | 0.33 (0.08-1.43)           | 0.139          |
| Obesity        | <b>1.99 (1.03-3.87)</b> | <b>0.041 *</b>     | 2.31 (0.99-5.41)           | 0.053          |
| CKD            | <b>3.53 (1.25-9.99)</b> | <b>0.017 *</b>     | 3.80 (0.82-17.66)          | 0.088          |
| Smoking (Now)  | 1.59 (0.67-3.78)        | 0.295              | 1.62 (0.65-4.06)           | 0.304          |
| Smoking (Past) | 1.55 (0.58-4.14)        | 0.387              | 1.85 (0.61-5.64)           | 0.277          |
| PVD            | 4.07 (0.98-16.94)       | 0.054              | 1.35 (0.14-12.84)          | 0.793          |
| ACS            | 2.53 (0.99-6.52)        | 0.054              | 3.93 (0.76-20.40)          | 0.104          |
| Hypertension   | 1.07 (0.47-2.45)        | 0.870              | 1.46 (0.36-5.87)           | 0.592          |

CKD= chronic kidney disease. PVD= peripheral vascular disease. ACS= acute coronary syndrome. \* Statistically significant results are highlighted in bold.

**Table S3. Crude and adjusted HRs for pericarditis.**

|                | Univariable model        |                    | Multivariable model      |                |
|----------------|--------------------------|--------------------|--------------------------|----------------|
|                | HR (95% CI)              | P Value            | aHR (95% CI)             | P Value        |
| COVID-19       | 0.63 (0.33-1.22)         | 0.171              | 0.53 (0.25-1.13)         | 0.100          |
| Age            | <b>1.02 (1.00-1.03)</b>  | <b>0.019 *</b>     | 1.01 (0.99-1.03)         | 0.537          |
| Sex (male)     | <b>1.89 (1.14-3.14)</b>  | <b>0.014 *</b>     | <b>1.93 (1.09-3.41)</b>  | <b>0.025 *</b> |
| BMI            | 1.00 (0.99-1.02)         | 0.625              | 1.00 (0.94-1.06)         | 0.897          |
| Diabetes       | <b>1.95 (1.06-3.59)</b>  | <b>0.032 *</b>     | 0.97 (0.43-2.21)         | 0.950          |
| Hyperlipidemia | <b>1.79 (1.09-2.94)</b>  | <b>0.021 *</b>     | 1.13 (0.54-2.38)         | 0.749          |
| Obesity        | 1.40 (0.83-2.36)         | 0.213              | 1.32 (0.64-2.71)         | 0.448          |
| CKD            | <b>4.09 (1.95-8.59)</b>  | <b>&lt;0.001 *</b> | 1.91 (0.72-5.05)         | 0.191          |
| Smoking (Now)  | 1.13 (0.56-2.27)         | 0.727              | 0.85 (0.42-1.74)         | 0.661          |
| Smoking (Past) | 1.23 (0.57-2.63)         | 0.597              | 0.73 (0.33-1.63)         | 0.439          |
| PVD            | <b>7.23 (3.12-16.78)</b> | <b>&lt;0.001 *</b> | <b>4.20 (1.50-11.72)</b> | <b>0.006 *</b> |
| ACS            | <b>3.31 (1.73-6.34)</b>  | <b>&lt;0.001 *</b> | 1.52 (0.61-3.80)         | 0.366          |
| Hypertension   | <b>1.77 (1.02-3.06)</b>  | <b>0.041 *</b>     | 0.88 (0.38-2.06)         | 0.770          |

CKD= chronic kidney disease. PVD= peripheral vascular disease. ACS= acute

coronary syndrome. \* Statistically significant results are highlighted in bold.
